# Supplementary material for: Bio-inspired formation of nanostructured arrays on flexible substrates with superoleophobicity
Source: Royal Society of Chemistry journal article supplement (doi:10.1039/c5ce01506e), 2015-01-01
Supplement: c5ce01506e2.pdf [file c5ce01506e2.pdf]

# Bio-Inspired Formation of Nanostructured Arrays on Flexible Substrates with Superoleophobicity

*Xinghua Meng, Da Deng\**

Department of Chemical Engineering and Materials Science, Wayne State University,

5050 Anthony Wayne Dr. Detroit, MI, United States, 48202

Email: [da.deng@wayne.edu](mailto:da.deng@wayne.edu)

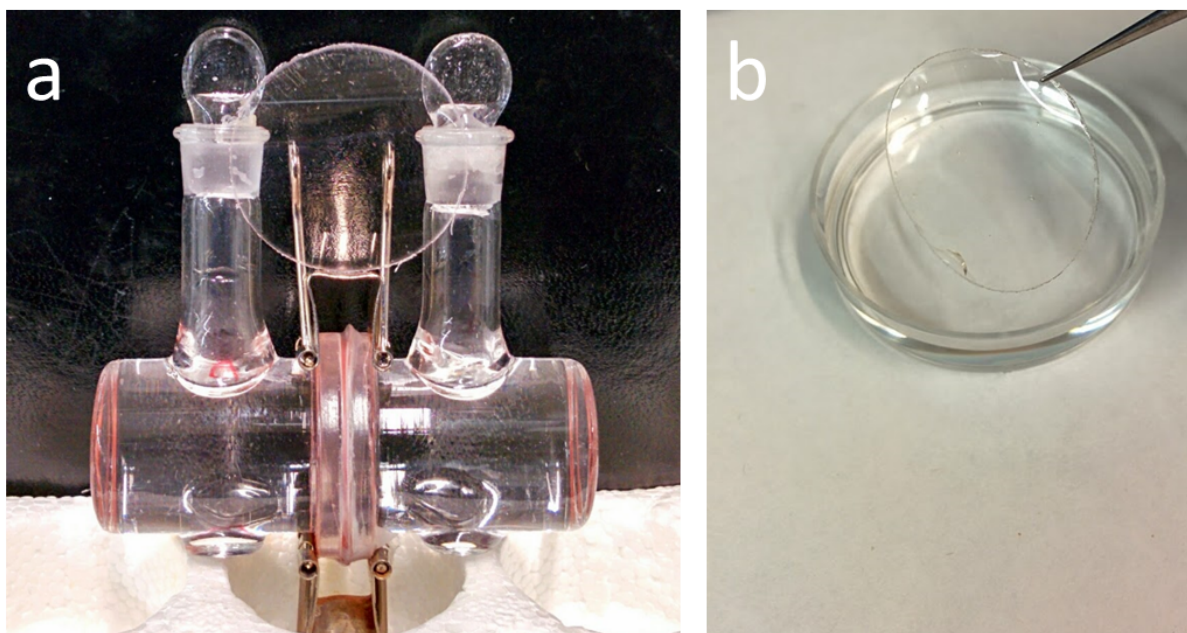

**Figure S1.** Optical images of (a) a reactor with two chambers with two precursor solutions separated by a piece of Nafion membrane sealed with two O-rings, and (b) a piece of transparent Nafion N117 membrane rinsed in water **before** use.

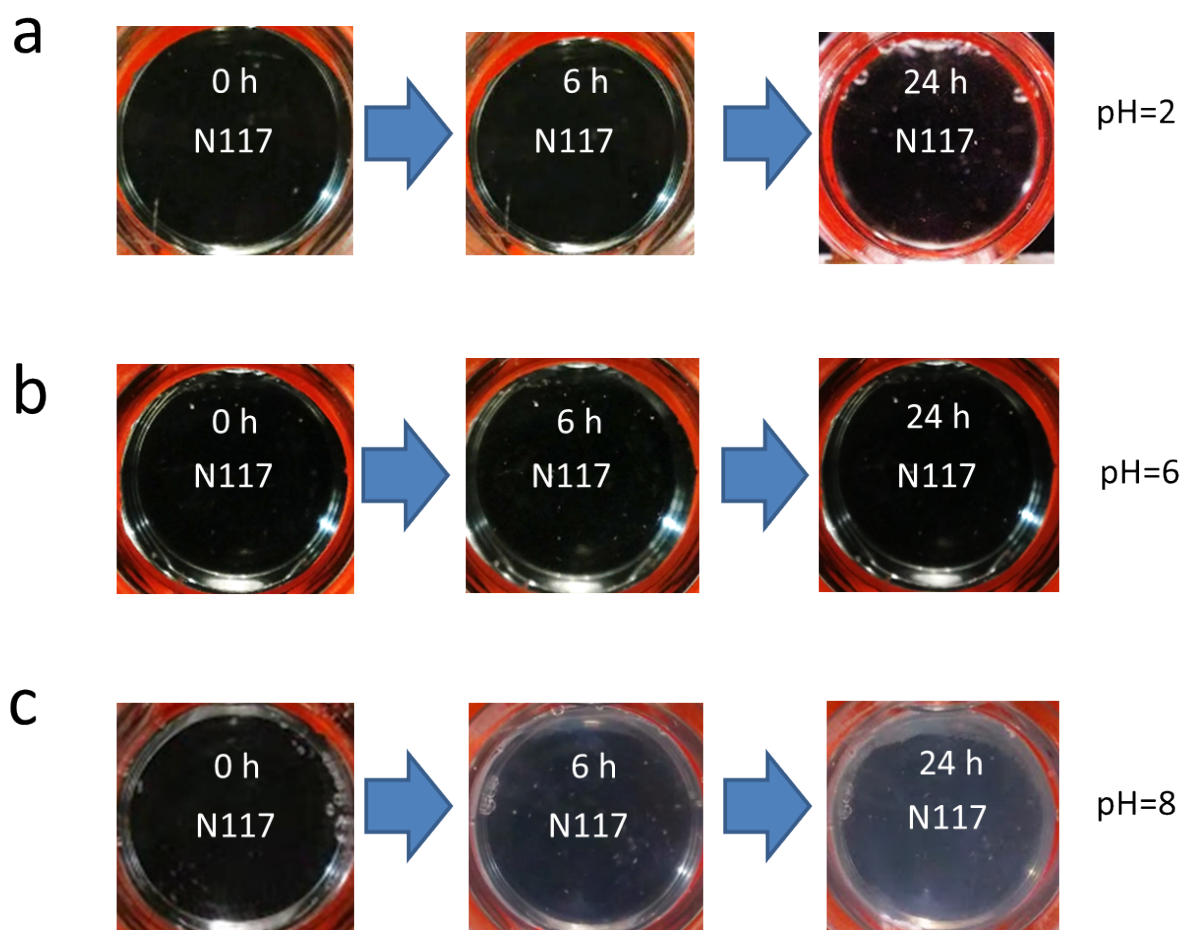**Figure**

**re S2.** Optical images of the color changes vs time of the Nafion membrane inside the reactors with one chamber filled with  $[\text{PO}_4^{3-}]$  solution adjusted to different pH values of (a) 2; (b) 6; (c) 8, keeping all other conditions unchanged.

We would like to highlight that the formation of  $\text{Mn}_3(\text{PO}_4)_2 \cdot 3\text{H}_2\text{O}$  is highly sensitive to the pH of solution.<sup>1</sup> In the design of our experiments, we are aware of that under acid conditions,  $\text{Mn}^{2+}$  could not form any solid precipitate with  $\text{PO}_4^{3-}$ .<sup>2</sup> In contrast, in alkali solution,  $\text{Mn}^{2+}$  could be partially oxidized to  $\text{Mn}^{3+}$  in the presence of oxygen in air forming  $\text{Mn}_3\text{O}_4$ .<sup>3</sup> Practically, we found that in the case that pure 0.1 M  $\text{H}_3\text{PO}_4$  solution without pH adjustment, no solid formation was observed after 7 days under the same typical experimental conditions due to the acidic

environment. A series of controlled  $[\text{PO}_4^{3-}]$  solutions with different pH values adjusted by LiOH were systematically investigated. We observed that no  $\text{Mn}_3(\text{PO}_4)_2 \cdot 3\text{H}_2\text{O}$  white solid formed even till the pH value was adjusted to 6. White colored  $\text{Mn}_3(\text{PO}_4)_2 \cdot 3\text{H}_2\text{O}$  could be observed when the pH value of the  $[\text{PO}_4^{3-}]$  solution was adjusted to 8. The changes by color during reactions in chambers with different pH values (pH= 2, 6, 8, respectively) of  $[\text{PO}_4^{3-}]$  solution were recorded throughout the process of 24 h (Figure S2 in SI). However, in the case of an excessive amount of LiOH was used to adjust the pH value of  $[\text{PO}_4^{3-}]$  solution to 10, precipitation of white-colored  $\text{Li}_3\text{PO}_4$  ( $3\text{Li}^+ + \text{PO}_4^{3-} \rightarrow \text{Li}_3\text{PO}_4$ ) occurred during the process of adjusting the pH value (Figure S3 in SI).

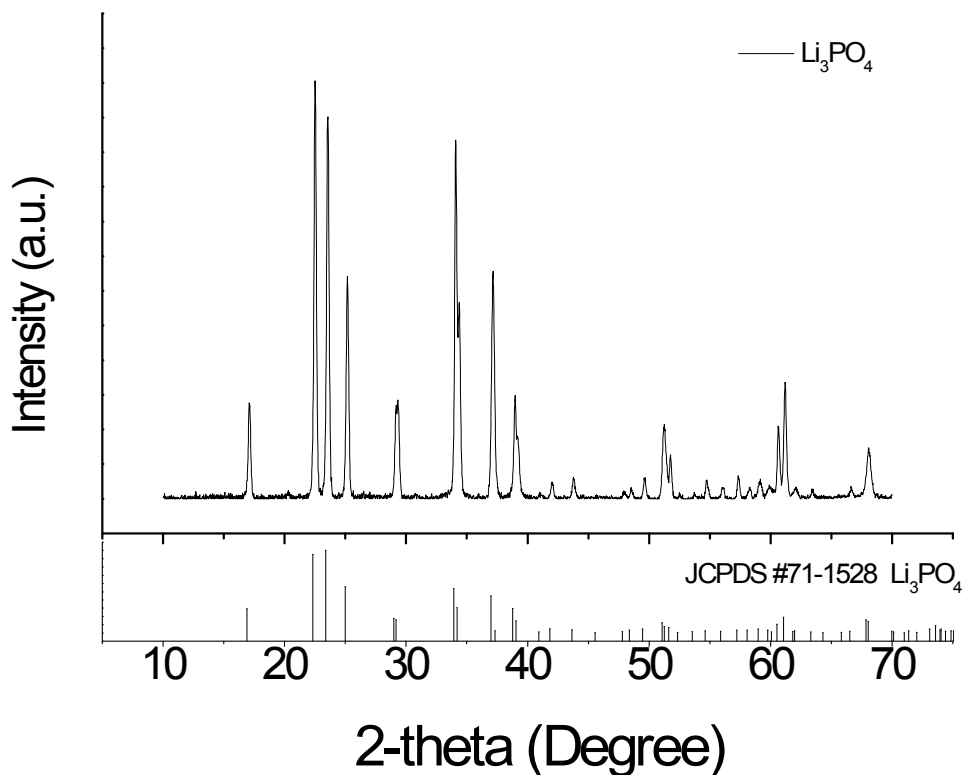

**Figure S3.** XRD pattern of  $\text{Li}_3\text{PO}_4$  obtained in  $[\text{PO}_4^{3-}]$  solution by adjusting pH to 10.

We tried to preliminarily assess the stability of nanoflakes in water (Figure S4 in SI). For nanoflakes obtained with shorter reaction time of 6 h and 24 h, they could be dissolved in DI water which suggests poor stability. It could be attributed to the exposure of early formed  $\text{Mn}_3(\text{PO}_4)_2 \cdot 3\text{H}_2\text{O}$  nanoflakes in unsaturated environment.<sup>4,5</sup> The possible mechanism of dissolution could be explained as follows: In DI water or unsaturated conditions, a new equilibrium between solid and solution must be reached which lead to the release of ions from the solid nanoflakes or dissolution. Besides, the pH value of DI water (pH = 6) is much lower than that in the original adjusted  $[\text{PO}_4^{3-}]$  solution (pH = 8), which could accelerate the dissolution in DI water as well.<sup>6</sup> Besides, the precursors might involve less crystalline and amorphous structures. The high solubility of amorphous structures are well documented.<sup>7</sup> In the case of  $\text{Mn}_3(\text{PO}_4)_2 \cdot 3\text{H}_2\text{O}$  nanoflakes obtained after 7 days of reaction, there are still significant amounts nanoflakes remained on the surface after 24 h immersion in water suggesting relatively good stability. The observation could be attributed to the large amount of solid  $\text{Mn}_3(\text{PO}_4)_2 \cdot 3\text{H}_2\text{O}$  nanoflakes available for dissolution. Additionally, the higher degree of crystallinity also can enhance its stability in water. However, further studies are required to gain better understanding.

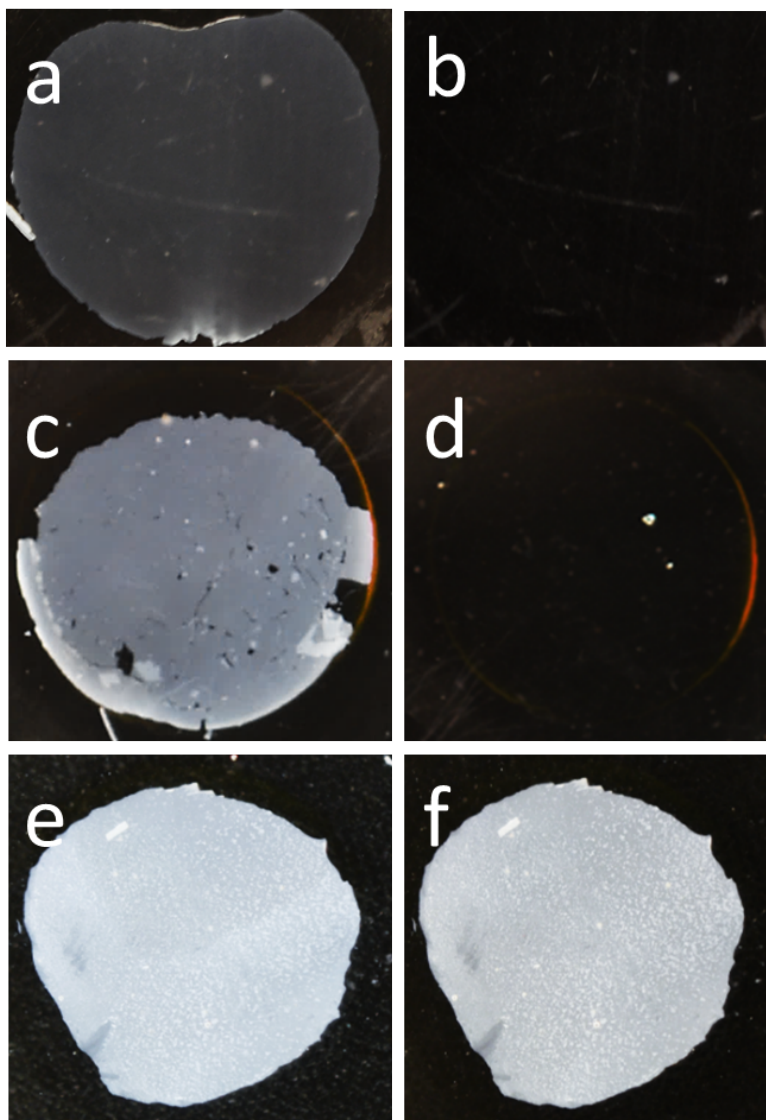

**Figure S4.** Optical images of Nafion N117 membranes coated with  $\text{Mn}_3(\text{PO}_4)_2 \cdot 3\text{H}_2\text{O}$  obtained after various times of reaction: (a) the 6 h sample after immersed in **deionized** water for 1 min and (b) 6 h; (c) the 24 h sample after immersed in fresh water for 1 min and (d) 24 h; (e) the 7 d sample after immersed in fresh water for 1 min and (f) 24 h.

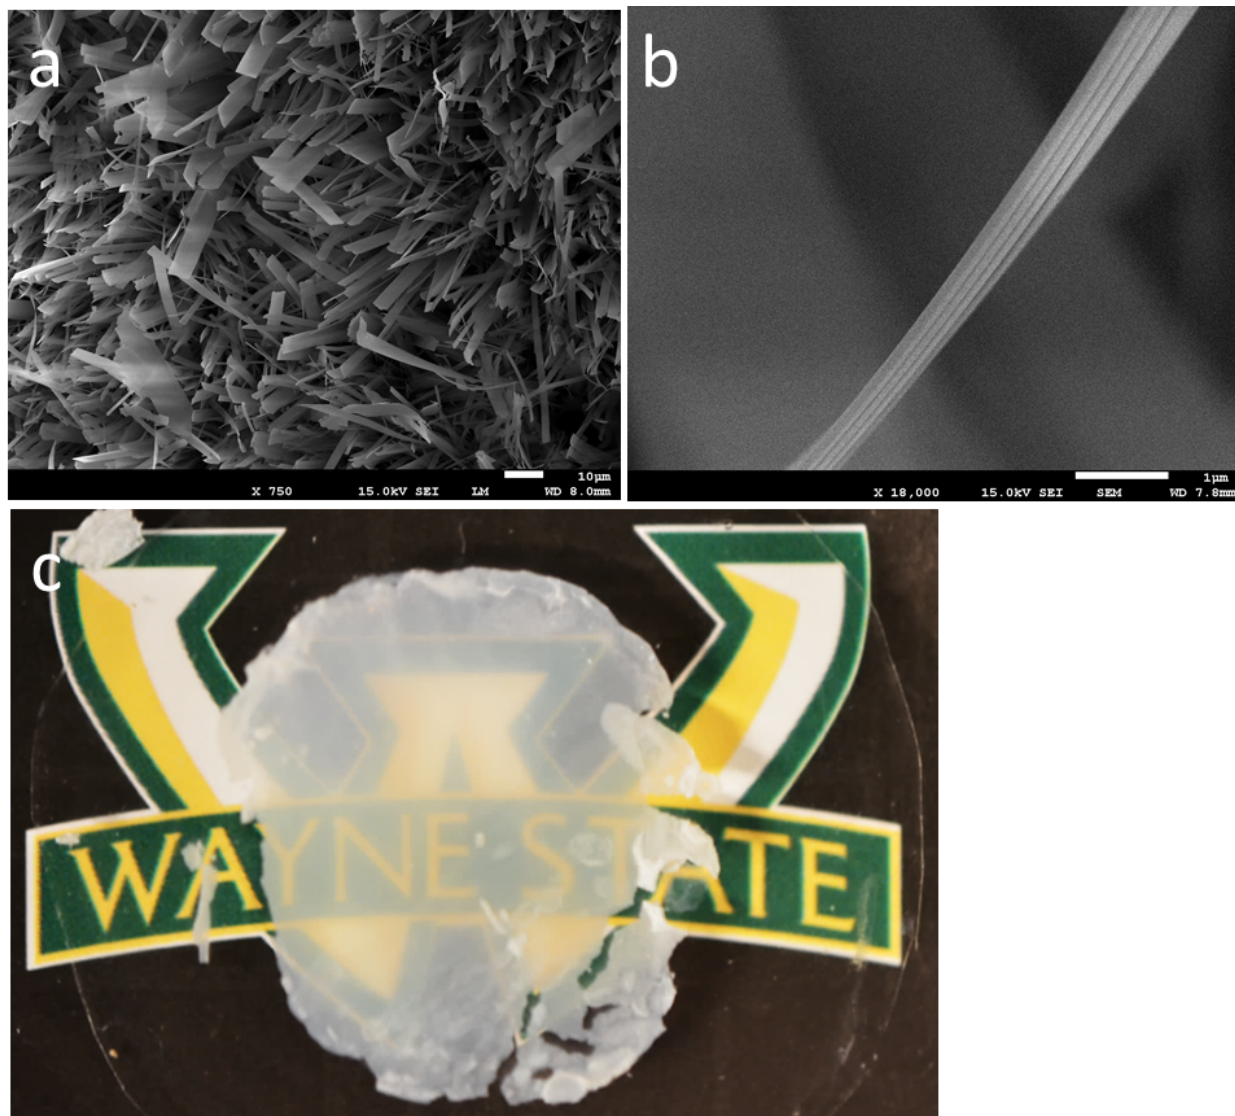

**Figure S5.** Mn<sub>3</sub>(PO<sub>4</sub>)<sub>2</sub>·3H<sub>2</sub>O nanobelt arrays prepared on Nafion N117 membrane after a reaction time of 24 h at 50 °C keeping other experimental conditions unchanged as those typical condition: (a) low-magnified FESEM image; (b) high-magnification view of a section of a nanobelt with layer-like structure; (c) optical images of the Mn<sub>3</sub>(PO<sub>4</sub>)<sub>2</sub>·3H<sub>2</sub>O nanobelt arrays prepared on Nafion N117 membrane immersed in water.

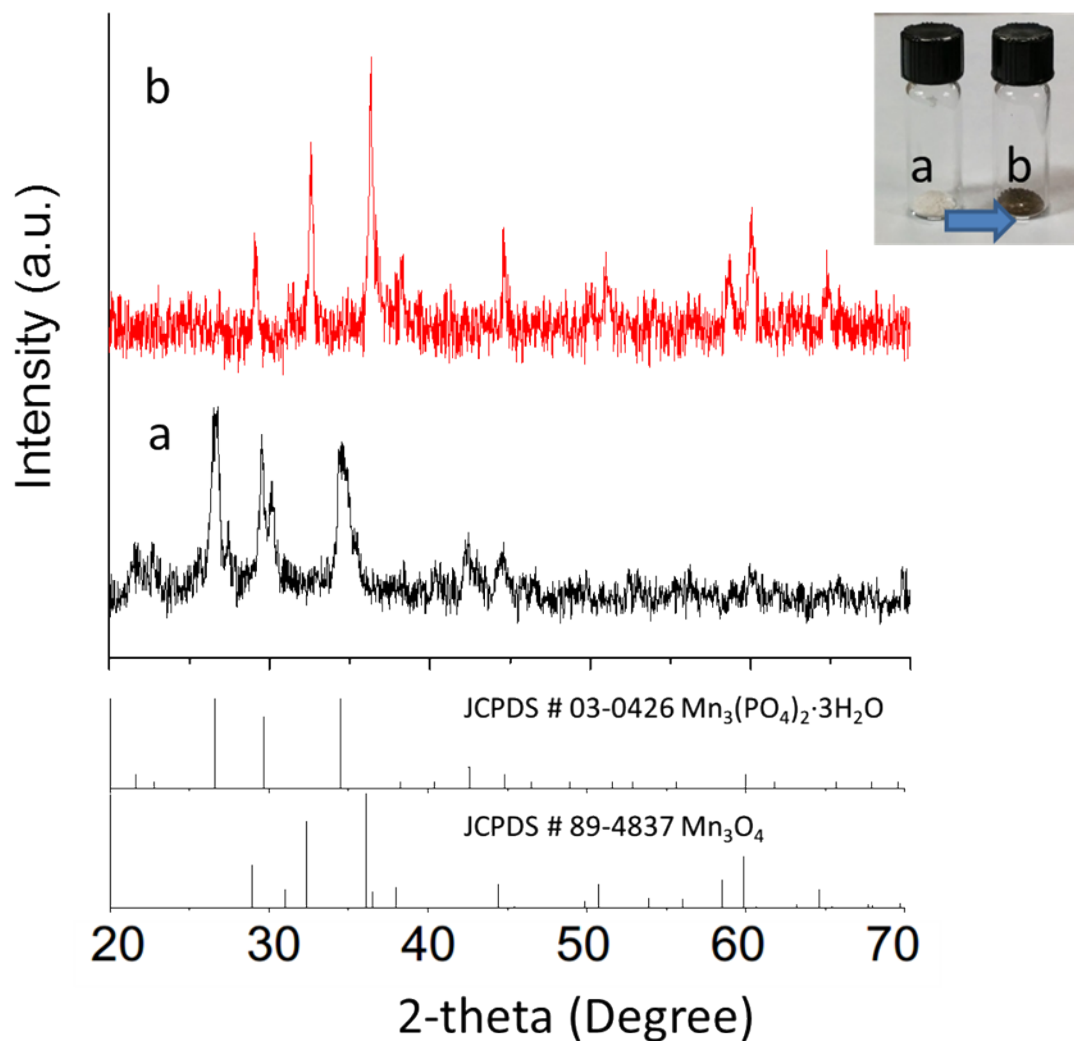

**Figure S6.** The XRD patterns of samples of (a) Mn<sub>3</sub>(PO<sub>4</sub>)<sub>2</sub>·3H<sub>2</sub>O nanoflake obtained after a typical reaction, (b) Mn<sub>3</sub>O<sub>4</sub> after sample (a) was immersed in 1 M KOH solution for 24 h. The inset is the optical image of the color change from white (a) to black (b) corresponding to Mn<sub>3</sub>(PO<sub>4</sub>)<sub>2</sub>·3H<sub>2</sub>O and Mn<sub>3</sub>O<sub>4</sub>, respectively. The possible reaction involved in the transfer could be:  $2\text{Mn}_3(\text{PO}_4)_2 \cdot 3\text{H}_2\text{O} + 12\text{KOH} + \text{O}_2 \rightarrow 2\text{Mn}_3\text{O}_4 + 4\text{K}_3\text{PO}_4 + 12\text{H}_2\text{O}$

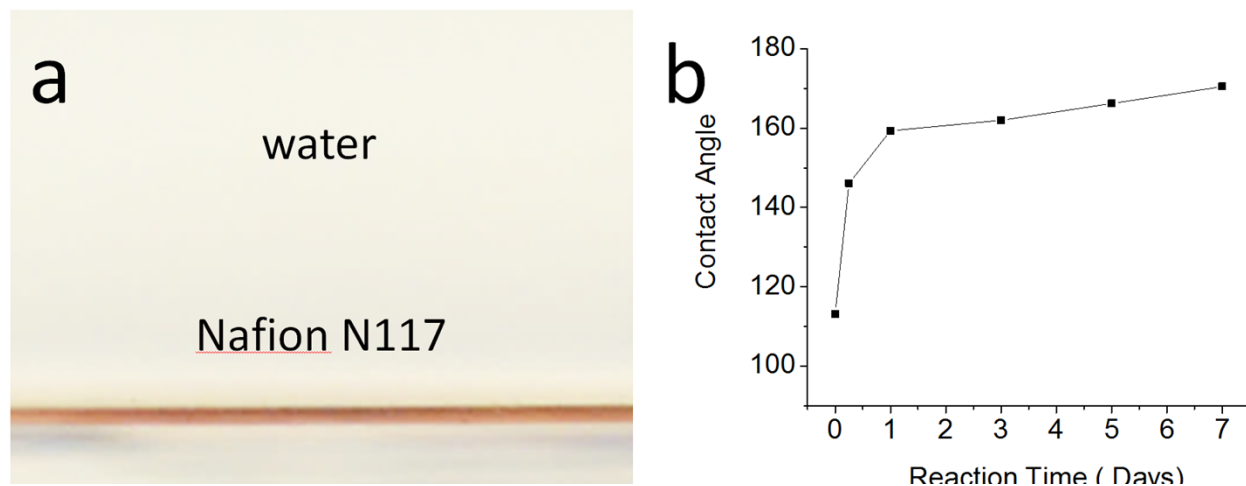

**Figure S7.** (a) Optical image of bared Nafion N117 membrane in water showing flat nature; (b) The underwater oil contact angles of the oil droplets sitting on  $2\text{Mn}_3(\text{PO}_4)_2 \cdot 3\text{H}_2\text{O}$  covered Nafion membranes obtained after different reaction periods of 6 h, 24 h, 3 d, 5 d, and 7 d. The 0 h data is from bare Nafion membrane.

- (1) Zhu, H. J.; Zhai, W.; Yang, M.; Liu, X. M.; Chen, Y. C.; Yang, H.; Shen, X. D. *RSC Adv.* **2014**, *4*, 25625.
- (2) Alvarado-Macias, G.; Fuentes-Aceituno, J. C.; Salinas-Rodriguez, A.; Rodriguez-Varela, F. *J. J Mex Chem Soc* **2013**, *57*, 328.
- (3) Mckenzie, R. M. *Mineral Mag* **1971**, *38*, 493.
- (4) Cai, Y. R.; Tang, R. K. *J. Mater. Chem.* **2008**, *18*, 3775.
- (5) Tang, R. K.; Wu, W. J.; Haas, M.; Nancollas, G. H. *Langmuir* **2001**, *17*, 3480.
- (6) Yu, J.; Hao, R.; Sheng, F. G.; Xu, L. L.; Li, G. J.; Hou, Y. L. *Nano Res.* **2012**, *5*, 679.
- (7) Cleries, L.; Fernandez-Pradas, J. M.; Sardin, G.; Morenza, J. L. *Biomaterials* **1998**, *19*, 1483.
